# Supplementary material
Source: PubMed Central journal article supplement (PMC3255849)
Supplement: supp_86.2.865_FigS1_TableS1-S2.pdf [file supp_86.2.865_FigS1_TableS1-S2.pdf]

### Supplementary Fig. 1.

Alignment of the feline, canine and raccoon Tfr sequences, showing the positions in the receptor that differ between the different species. Residues identical to the raccoon Tfr (.) and gaps (-) are indicated. The glycosylation site unique to the canine Tfr that restricts FPV binding is labeled by a shaded red box. The helical domain (yellow), protease-like domain (blue) and apical domain (green) are indicated, as are the cytoplasmic tail (orange) and the transmembrane domain (magenta).

|             |                                                                                   |     |
|-------------|-----------------------------------------------------------------------------------|-----|
| Canine Tfr  | .....M..N....P....C.....                                                          | 80  |
| Raccoon Tfr | MMDQARSASFSTLFGGPEPLSYTRFSLARQVDGDNHVMKLADEEENVDNNVRGSHASVTKPKRFNGFICYGTIAVVLFF   | 80  |
| Feline Tfr  | .....M.DNG.....II...                                                              | 80  |
| Canine Tfr  | .....G....T...A.GT.R.E...T..YF...P.....T.LS...S...FTN.M.W....                     | 160 |
| Raccoon Tfr | LIGFMIGYLYGCKRVEPKAECERPSGTESLAIEGTAPSENEEDVPETSSRLFMTDLKMKFLERLNGTDLVLTIRLLNENS  | 160 |
| Feline Tfr  | .....A.S.....A.....EV...E...T..YF..AP.H...S...T.LS.K.S..EFTS...Q....              | 160 |
| Canine Tfr  | .....LL...RF.EFQ..KS.R....E.....N.Q.T....DME.DL...A.....T....                     | 240 |
| Raccoon Tfr | YVPREAGSQKDESLAFFIENQLRITYLLSRVWHDEYFVKIQVKSARSNSVTIVGTDSGVVYLVESPEGYVAYSKAATVTG  | 240 |
| Feline Tfr  | .F.....RF.ELQ..KA.....V...G...S.....N..M.....                                     | 239 |
| Canine Tfr  | ...V.....K.PV....A.....Y..L....M..A...V..R..F.....                                | 320 |
| Raccoon Tfr | RLVHANFGTKKDFENLNSRANGSLVIVRAGKITFAEKVANAQSFNAIGVLIYKQSRFPIINAEIPVFGHAHLGTGDPYT   | 320 |
| Feline Tfr  | .....PV.....E.....M..AK...T...F.....                                              | 319 |
| Canine Tfr  | .....I.P.....S.K. <b>N</b> .....V.                                                | 400 |
| Raccoon Tfr | PGFPSFNHTQFPSPQSGLPSIPQVTISRAAAEKL FENMEGDCPSAWETDSSCRLET SQNRNKLTVNNVLKEIRIFNIF  | 400 |
| Feline Tfr  | .....N.....N....G.....R.W...S.....V.                                              | 399 |
| Canine Tfr  | .....I.....L..G.K.....                                                            | 480 |
| Raccoon Tfr | GVIKGFEEPDYVYVGAQRDAWGPGAAKSSVGTALLLELARI FSDMVTKGDFRPSRSIVFASWSAGDFGATEWLEGY     | 480 |
| Feline Tfr  | .....H.....L...L..G.K.....V.....                                                  | 479 |
| Canine Tfr  | .....I.....L.....I.....I...KL.....                                                | 560 |
| Raccoon Tfr | LSSLHLKAFYINLDKAVLGTSNFKVSASPLLYSLIEKTMKDVKHPVTGQSLYRDSNWSNKVEEFLDNAAFPLAYSIGI    | 560 |
| Feline Tfr  | .....V.....I...K.....                                                             | 559 |
| Canine Tfr  | .....T..L..N.NQ....N.....T.....R.....M.Q...                                       | 640 |
| Raccoon Tfr | PAVSFCFCEDTDYPYLGTMPDYEKLSKIPQLSKMARGAAEVAGQLIMKLVYDLELNLNYEMYNDKILSFVRDVRNFRFT   | 640 |
| Feline Tfr  | .....T..V...IQ.V...N...A.....T.....S...A                                          | 639 |
| Canine Tfr  | .....Y.....FV.....HN.....P                                                        | 720 |
| Raccoon Tfr | DIKEMGLNLQWLYSARGDFFRATSRLTTDIKNAERTNRYIMREINDRIMKVEYHFLSPYVSPRDSRPFRIHFWGSGSHTLS | 720 |
| Feline Tfr  | .....YR.....F..D.....R.....E.....T.....                                           | 719 |
| Canine Tfr  | ..V.....K.....F.                                                                  | 770 |
| Raccoon Tfr | ALLEHLKLRQKNNSAFNETLLRNQLALATWTIQGAANALSGDIWDIDNEL.                               | 770 |
| Feline Tfr  | .....E.I.....F.....T.....F.                                                       | 769 |

| GenBank<br>Accession<br>Number     | Sample Name                     |
|------------------------------------|---------------------------------|
| <b>Table 1 VP2 gene sequences.</b> |                                 |
| U22189                             | FPV/Cat/US/FPV-d/64             |
| D00765                             | MEV/Mink/Japan/Abashiri/78      |
| EU698028                           | BFPV/Blue_fox/China/Tai`an/07   |
| D88287                             | FPV/Cat/France/PLI-IV/68        |
| M24002                             | FPV/Cat/UK/FPV-a/62             |
| EU498717                           | FPV/Cat/UK/50-2/07              |
| EU498719                           | FPV/Cat/UK/490/07               |
| U22187                             | FPV/Cat/ID/FPV-23/90            |
| EU498714                           | FPV/Cat/UK/97-11/06             |
| X55115                             | FPV/Cat/Australia/193/70        |
| EU498713                           | FPV/Cat/UK/97-10/06             |
| FJ440714                           | FPV/Cat/Argentina/ARG08/07      |
| FJ440712                           | FPV/Cat/Argentina/ARG06/07      |
| FJ440711                           | FPV/Cat/Argentina/ARG05/07      |
| FJ440713                           | FPV/Cat/Argentina/ARG07/07      |
| EU659113                           | FPV/Mountain_lion/CO/FPV-8a/89  |
| EU659114                           | FPV/Mountain_lion/CO/FPV-8b/89  |
| AB000052                           | FPV/Cat/Japan/AO1/94            |
| AB000068                           | FPV/Cat/Japan/TU4/75            |
| AB000066                           | FPV/Cat/Japan/TU2/75            |
| AB000064                           | FPV/Cat/Japan/TU12/79           |
| AB000070                           | FPV/Cat/Japan/TU8/76-77         |
| AB000054                           | FPV/Cat/Japan/Fukagawa/93       |
| D88286                             | FPV/Cat/Japan/483/90            |
| AB000061                           | FPV/Cat/Japan/Som4/95           |
| AB000050                           | FPV/Cat/Japan/94-1/94           |
| AB000059                           | FPV/Cat/Japan/Som1/94           |
| <b>JN867594</b>                    | <b>FPV/Raccoon/NJ/RPV-6/90</b>  |
| EU659111                           | FPV/Cat/US/FPV-3/67             |
| <b>JN867593</b>                    | <b>FPV/Raccoon/CA/208-A/10</b>  |
| M24004                             | FPV/Cat/US/FPV-b/67             |
| <b>JN867595</b>                    | <b>FPV/Raccoon/TX/Rac2.2/78</b> |
| <b>JN867596</b>                    | <b>FPV/Raccoon/TX/Rac1.2/78</b> |
| <b>M24005</b>                      | <b>RPV/Raccoon/TX/Rac1.1/78</b> |
| EU659112                           | FPV/Cat/US/FPV-4/64             |
| M23999                             | MEV/Mink/WI/MEV-a/73            |
| AB000056                           | FPV/Cat/Japan/Obihiro/74        |
| EU498707                           | FPV/Cat/Italy/42-G12/06         |
| EU498701                           | FPV/Cat/Italy/42-G5/06          |

EU498718 FPV/Cat/Italy/443/07  
EU498720 FPV/Cat/Italy/498/07  
FJ712217 MEV/Mink/China/Suning/08  
FJ712219 MEV/Mink/China/Manzhouli/08  
FJ712218 MEV/Mink/China/Dalian/08  
FJ712221 MEV/Mink/China/LYT-2/08  
FJ712220 MEV/Mink/China/MDQ/08  
EU498716 FPV/Cat/UK/50-1/07  
EU498683 FPV/Cat/Italy/41/02  
EU498682 FPV/Cat/Italy/198/01  
EU145593 FPV/Asian\_palm\_civet/Malaysia/389/07  
EU360959 FPV/Cat/Hungary/1335/07  
EU360958 FPV/Cat/Hungary/933/07  
EU498699 FPV/Cat/Italy/42-G3/06  
EU498706 FPV/Cat/Italy/42-G11/06  
EU498705 FPV/Cat/Italy/42-G10/06  
EU498692 FPV/Cat/Italy/143/04  
EU498690 FPV/Cat/Italy/134-3/04  
U22188 FPV/Cat/Germany/FPV-377/93  
EU498704 FPV/Cat/Italy/42-G8/06  
EU498693 FPV/Cat/Italy/355/04  
EU498698 FPV/Cat/Italy/42-G2/06  
EU498686 FPV/Cat/Italy/189/03  
EU221281 FPV/Cat/Portugal/31609/06  
AB054225 FPV/Cat/Vietnam/V142/97  
AB054226 FPV/Cat/Vietnam/V208/97  
AB054227 FPV/Cat/Vietnam/V211/97  
FJ936171 FPV/Cat/China/ChangC/08  
EU697387 FPV/Tiger/China/HT-163/07  
FJ405225 FPV/Tiger/China/TCH08/08  
EU697384 FPV/Tiger/China/HT-290/07  
EU697383 FPV/Tiger/China/HT-262/07  
EU697386 FPV/Tiger/China/HT-374/07  
EU498687 FPV/Cat/Italy/300/03  
EU498684 FPV/Cat/Italy/103/02  
EU498712 FPV/Cat/Italy/42-G19/06  
EU498694 FPV/Cat/Italy/20/05  
EU498700 FPV/Cat/Italy/42-G4/06  
EU498691 FPV/Cat/Italy/134-5/04  
EU498715 FPV/Cat/Italy/228/06  
EU498688 FPV/Cat/Italy/134-1/04  
EU498685 FPV/Cat/Italy/150/03  
EU498695 FPV/Cat/Italy/119/05

|          |                                      |
|----------|--------------------------------------|
| EU498711 | FPV/Cat/Italy/42-G18/06              |
| EU498702 | FPV/Cat/Italy/42-G6/06               |
| EU498696 | FPV/Cat/Italy/22/06                  |
| EU498708 | FPV/Cat/Italy/42-G14/06              |
| EU221280 | FPV/Cat/Portugal/39897/06            |
| EU221278 | FPV/Cat/Portugal/52171/05            |
| EU221279 | FPV/Cat/Portugal/46912/05            |
| EF418569 | FPV/Lion/Portugal/LPT06/06           |
| EF418568 | FPV/Tiger/Portugal/TPT06/06          |
| EU498697 | FPV/Cat/Italy/42-G1/06               |
| EU498689 | FPV/Cat/Italy/134-2/04               |
| EU498703 | FPV/Cat/Italy/42-G7/06               |
| EU498710 | FPV/Cat/Italy/42-G17/06              |
| EU498709 | FPV/Cat/Italy/42-G16/06              |
| EU659115 | FPV/Cat/US/Kai/06                    |
| U22185   | BFPV/Blue_fox/Finland/BFPV-1/83      |
| FJ231389 | FPV/Monkey/China/BJ-22/08            |
| FJ435344 | CPV-2/Dog/China/CN-3/08              |
| FJ435348 | CPV-2/Dog/China/CN-7/08              |
| FJ435342 | CPV-2/Dog/China/CN-1/08              |
| U22193   | CPV-2/Raccoon_dog/Finland/RD-87/87   |
| U22192   | CPV-2/Raccoon_dog/Finland/RD-80/80   |
| EU659117 | CPV-2/Dog/NY/CPV-6/79                |
| M23255   | CPV-2/Dog/NY/CPV-d/79                |
| EU659116 | CPV-2/Dog/FL/CPV-5/80                |
| U22186   | CPV-2/Dog/US/CPV-128/79              |
| FJ222824 | CPV-2/Dog/Italy/388-3/05             |
| EU441280 | CPV/Masked_palm_civet/China/HeN02/08 |
| JN867598 | CPV/Bobcat/KS/44/10                  |
| JN867618 | CPV/Raccoon/WI/37/10                 |
| JN867612 | CPV/Raccoon/TN/351/09                |
| JN867610 | CPV/Raccoon/VA/118-A/07              |
| JN867611 | CPV/Raccoon/KY/358-B/09              |
| JN867599 | CPV/Raccoon/KY/39552/09              |
| JN867600 | CPV/Raccoon/KY/33817/09              |
| JN867616 | CPV/Raccoon/GA/289/08                |
| JN867615 | CPV/Raccoon/GA/287/08                |
| JN867617 | CPV/Raccoon/GA/349/08                |
| JN867613 | CPV/Raccoon/FL/381/09                |
| JN867597 | CPV/Raccoon/NY/94742/10              |
| JN867614 | CPV/Raccoon/VA/278-A/09              |
| AB054222 | CPV-2a/Leopard_cat/Vietnam/V139/97   |
| AB054223 | CPV-2a/Leopard_cat/Vietnam/V140/97   |

|          |                             |
|----------|-----------------------------|
| DQ340431 | CPV-2a/Dog/Brazil/BR56/95   |
| DQ340428 | CPV-2a/Dog/Brazil/BR209/94  |
| DQ340411 | CPV-2a/Dog/Brazil/BR8/90    |
| DQ340433 | CPV-2a/Dog/Brazil/BR7168/00 |
| DQ340417 | CPV-2a/Dog/Brazil/BR52/91   |
| DQ340425 | CPV-2a/Dog/Brazil/BR227/93  |
| DQ340424 | CPV-2a/Dog/Brazil/BR137/90  |
| DQ340421 | CPV-2a/Dog/Brazil/BR597/92  |
| DQ340429 | CPV-2a/Dog/Brazil/BR237/94  |
| DQ340434 | CPV-2a/Dog/Brazil/BR8155/00 |
| DQ340420 | CPV-2a/Dog/Brazil/BR593/92  |
| DQ340415 | CPV-2a/Dog/Brazil/BR43/90   |
| DQ340419 | CPV-2a/Dog/Brazil/BR570/92  |
| DQ340423 | CPV-2a/Dog/Brazil/BR136/93  |
| DQ340426 | CPV-2a/Dog/Brazil/BR84/94   |
| DQ340414 | CPV-2a/Dog/Brazil/BR31/90   |
| DQ340432 | CPV-2a/Dog/Brazil/BR62/95   |
| DQ340427 | CPV-2a/Dog/Brazil/BR133/94  |
| DQ340418 | CPV-2a/Dog/Brazil/BR491/92  |
| DQ340416 | CPV-2a/Dog/Brazil/BR47/91   |
| DQ340422 | CPV-2a/Dog/Brazil/BR22/93   |
| DQ340412 | CPV-2a/Dog/Brazil/BR17/90   |
| DQ340413 | CPV-2a/Dog/Brazil/BR18/90   |
| FJ869128 | CPV-2a/Dog/Thailand/KU11/04 |
| FJ005257 | CPV-2a/Dog/Italy/54/08      |
| AF306446 | CPV-2a/Dog/Italy/584/94     |
| AB054217 | CPV-2a/Cat/Vietnam/V154/97  |
| DQ026002 | CPV-2a/Dog/France/S33/04    |
| AF306448 | CPV-2a/Dog/Italy/677/98     |
| DQ025959 | CPV-2a/Dog/France/C3/03     |
| AF306447 | CPV-2a/Dog/Italy/618/95     |
| DQ025944 | CPV-2a/Dog/France/B2/02     |
| FJ005259 | CPV-2a/Dog/Italy/100/08     |
| FJ005253 | CPV-2a/Dog/Italy/67/05      |
| DQ025999 | CPV-2a/Dog/France/S30/04    |
| DQ025986 | CPV-2a/Dog/France/S17/04    |
| DQ025982 | CPV-2a/Dog/France/S13/04    |
| DQ026000 | CPV-2a/Dog/France/S31/04    |
| DQ025996 | CPV-2a/Dog/France/S27/04    |
| DQ025943 | CPV-2a/Dog/France/S1/01     |
| AF393506 | CPV-2a/Dog/Italy/699/00     |
| FJ005256 | CPV-2a/Dog/Italy/17/08      |
| DQ025958 | CPV-2a/Dog/France/C2/03     |

|          |                                   |
|----------|-----------------------------------|
| FJ005255 | CPV-2a/Dog/Italy/333/05           |
| DQ025998 | CPV-2a/Dog/France/S29/04          |
| AY742935 | CPV-2a/Dog/Germany/CPV-U6/96      |
| DQ025963 | CPV-2a/Dog/France/C7/03           |
| DQ025962 | CPV-2a/Dog/France/C6/03           |
| DQ025983 | CPV-2a/Dog/France/S14/04          |
| DQ025993 | CPV-2a/Dog/France/S24/04          |
| DQ025946 | CPV-2a/Dog/France/B4/02           |
| DQ025947 | CPV-2a/Dog/France/B5/02           |
| FJ005252 | CPV-2a/Dog/Italy/96/02            |
| DQ025995 | CPV-2a/Dog/France/S26/04          |
| DQ025984 | CPV-2a/Dog/France/S15/04          |
| DQ025971 | CPV-2a/Dog/France/C11/04          |
| DQ025957 | CPV-2a/Dog/France/C1/03           |
| DQ025945 | CPV-2a/Dog/France/B3/02           |
| DQ025967 | CPV-2a/Dog/France/S3/03           |
| DQ026001 | CPV-2a/Dog/France/S32/04          |
| AB054215 | CPV-2a/Cat/Vietnam/V120/97        |
| AB054216 | CPV-2a/Cat/Vietnam/V129/97        |
| DQ025997 | CPV-2a/Dog/France/S28/04          |
| AY742933 | CPV-2a/Dog/New_Zealand/CPV-339/94 |
| FJ197823 | CPV-2a/Dog/South_Korea/CPVK1/07   |
| EF599096 | CPV-2a/Dog/South_Korea/DH426/05   |
| FJ869132 | CPV-2a/Dog/Thailand/KU19/04       |
| FJ869133 | CPV-2a/Dog/Thailand/KU21/04       |
| FJ869130 | CPV-2a/Dog/Thailand/KU13/04       |
| FJ869138 | CPV-2a/Dog/Thailand/KU53/03       |
| FJ869131 | CPV-2a/Dog/Thailand/KU18/04       |
| FJ869129 | CPV-2a/Dog/Thailand/KU12/04       |
| FJ869127 | CPV-2a/Dog/Thailand/KU9/04        |
| FJ869126 | CPV-2a/Dog/Thailand/KU5/08        |
| GQ169538 | CPV-2a/Dog/China/wh-2/06-08       |
| EF666060 | CPV-2a/Dog/China/BJ005/07         |
| EF666062 | CPV-2a/Dog/China/BJ010/07         |
| GQ379044 | CPV-2a/Dog/Thailand/KU143/09      |
| GQ379046 | CPV-2a/Dog/Thailand/KU531/09      |
| GQ379042 | CPV-2a/Thailand/KU13/08           |
| GQ379043 | CPV-2a/Dog/Thailand/KU14/08       |
| GQ379048 | CPV-2a/Dog/Thailand/KU739/09      |
| GQ379047 | CPV-2a/Dog/Thailand/KU616/09      |
| GQ379049 | CPV-2a/Dog/Thailand/KU18/08       |
| GQ379045 | CPV-2a/Dog/Thailand/KU146/09      |
| GQ169539 | CPV-2a/Dog/China/wh-3/06-08       |

|          |                                  |
|----------|----------------------------------|
| GQ169547 | CPV-2a/Dog/China/bj-3/06-08      |
| FJ432717 | CPV-2a/Dog/China/5-WH/08         |
| FJ435345 | CPV-2a/Dog/China/CN-4/08         |
| EF666067 | CPV-2a/Dog/China/BJ020/07        |
| EU145955 | CPV-2a/Dog/China/BJ050/07        |
| EU145959 | CPV-2a/Dog/China/BJ077/07        |
| EU145958 | CPV-2/Dog/China/BJ069/07         |
| GQ169546 | CPV-2a/Dog/China/bj-2/06-08      |
| EF666059 | CPV-2a/Dog/China/BJ004/07        |
| GQ169551 | CPV-2a/Dog/China/2-nj/06-08      |
| EU145953 | CPV-2a/Dog/China/BJ034/07        |
| FJ197841 | CPV-2a/Dog/South_Korea/CPVK19/07 |
| GQ169545 | CPV-2a/Dog/China/bj-1/06-08      |
| GQ169541 | CPV-2a/Dog/China/wh-5/06-08      |
| GQ169543 | CPV-2a/Dog/China/wh-7/06-08      |
| EF666066 | CPV-2a/Dog/China/BJ018/07        |
| EF666061 | CPV-2a/Dog/China/BJ008/07        |
| FJ435347 | CPV-2a/Dog/China/CN-6/08         |
| EU145956 | CPV-2a/Dog/China/BJ064/07        |
| EF011664 | CPV-2a/Dog/China/B2004/04        |
| GQ169542 | CPV-2a/Dog/China/wh-6/06-08      |
| EU697385 | CPV-2a/Dog/China/HLJ-JQ/07       |
| GQ169549 | CPV-2a/Dog/China/bj-5/06-08      |
| FJ869137 | CPV-2a/Dog/Thailand/KU52/03      |
| FJ869134 | CPV-2a/Dog/Thailand/KU23/03      |
| DQ354068 | CPV-2a/Red_panda/China/RPPV/04   |
| U72698   | CPV-2a/Dog/Taiwan/T37/95         |
| FJ197828 | CPV-2a/Dog/South_Korea/CPVK6/07  |
| FJ197829 | CPV-2a/Dog/South_Korea/CPVK7/07  |
| FJ197824 | CPV-2a/Dog/South_Korea/CPVK2/07  |
| FJ197834 | CPV-2a/Dog/South_Korea/CPVK12/07 |
| FJ197839 | CPV-2a/Dog/South_Korea/CPVK17/07 |
| DQ025950 | CPV-2a/Dog/France/B9/02          |
| FJ005254 | CPV-2a/Dog/Italy/331/05          |
| FJ005258 | CPV-2a/Dog/Italy/80/08           |
| FJ197831 | CPV-2a/Dog/South_Korea/CPVK9/07  |
| FJ197825 | CPV-2a/Dog/South_Korea/CPVK3/07  |
| FJ197833 | CPV-2a/Dog/South_Korea/CPVK11/07 |
| FJ197832 | CPV-2a/Dog/South_Korea/CPVK10/07 |
| FJ197837 | CPV-2a/Dog/South_Korea/CPVK15/07 |
| EF599098 | CPV-2a/Dog/South_Korea/Pome/05   |
| FJ197836 | CPV-2a/Dog/South_Korea/CPVK14/07 |
| FJ197840 | CPV-2a/Dog/South_Korea/CPVK18/07 |



FJ197830 CPV-2a/Dog/South\_Korea/CPVK8/07  
FJ197844 CPV-2a/Dog/South\_Korea/CPVK22/07  
FJ197838 CPV-2a/Dog/South\_Korea/CPVK16/07  
FJ197845 CPV-2a/Dog/South\_Korea/CPVK23/07  
FJ197826 CPV-2a/Dog/South\_Korea/CPVK4/07  
FJ197843 CPV-2a/Dog/South\_Korea/CPVK21/07  
FJ197842 CPV-2a/Dog/South\_Korea/CPVK20/07  
FJ197835 CPV-2a/Dog/South\_Korea/CPVK13/07  
EU441279 CPV-2a/Masked\_palm\_civet/China/HeN03/08  
GQ169544 CPV-2a/Dog/China/wh-8/06-08  
EU145961 CPV-2a/Dog/China/BJ085/07  
EF666065 CPV-2a/Dog/China/BJ17/06  
FJ197827 CPV-2a/Dog/South\_Korea/CPVK5/07  
EF666069 CPV-2a/Dog/China/BJ042/07  
GQ169537 CPV-2a/Dog/China/wh-1/06-08  
EU377537 CPV-2a/Dog/China/WH02/06  
FJ435346 CPV-2a/Dog/China/CN-5/08  
FJ435343 CPV-2a/Dog/China/CN-2/08  
EF666064 CPV-2a/Dog/China/BJ017/07  
EU145957 CPV-2a/Dog/China/BJ068/07  
GQ169540 CPV-2a/Dog/China/wh-4/06-08  
EF666068 CPV-2a/Dog/China/BJ027/07  
GQ169550 CPV-2a/Dog/China/1-nj/06-08  
FJ432716 CPV-2a/Dog/China/06-11-NJ/06  
EF666063 CPV-2a/Dog/China/BJ015/07  
GQ169548 CPV-2a/Dog/China/bj-4/06-08  
EU145960 CPV-2a/Dog/China/BJ082/07  
EU310373 CPV-2a/Dog/China/nj01/06  
AY742953 CPV-2a/Dog/CA/CPV-435/03  
DQ340430 CPV-2a/Dog/Brazil/BR46/94  
AF306445 CPV-2a/Dog/Italy/632/96  
FJ222821 CPV-2c/Dog/Italy/56/00  
AY742932 CPV-2b/Dog/TX/CPV-193/91  
FJ005264 CPV-2b/Dog/Italy/134/05  
AB054218 CPV-2b/Cat/Vietnam/V123/97  
FJ869123 CPV-2b/Dog/Thailand/KU3/08  
FJ869122 CPV-2b/Dog/Thailand/KU1/08  
FJ869124 CPV-2b/Dog/Thailand/KU4/08  
AB120726 CPV-2b/Dog/Vietnam/HNI-3-11/02  
AB120720 CPV-2b/Dog/Vietnam/HCM-6/02  
EU145954 CPV-2b/Dog/China/BJ044/07  
AB120728 CPV-2b/Cat/Vietnam/HNI-1-18/02  
AB120727 CPV-2c/Dog/Vietnam/HNI-4-1/02



|          |                                    |
|----------|------------------------------------|
| AB054221 | CPV-2b/Leopard_cat/Vietnam/V204/97 |
| AB120725 | CPV-2b/Dog/Vietnam/HNI-3-4/02      |
| AB054224 | CPV-2b/Leopard_cat/Vietnam/V203/97 |
| AB120722 | CPV-2b/Dog/Vietnam/HCM-18/02       |
| AB120724 | CPV-2b/Dog/Vietnam/HNI-2-13/02     |
| AB054219 | CPV-2b/Cat/Vietnam/V209/97         |
| AB120723 | CPV-2b/Dog/Vietnam/HCM-23/02       |
| AB054220 | CPV-2b/Cat/Vietnam/V217/97         |
| AB120721 | CPV-2b/Dog/Vietnam/HCM-8/02        |
| FJ869136 | CPV-2b/Dog/Thailand/KU46/03        |
| FJ869139 | CPV-2b/Dog/Thailand/KU66/03        |
| AY742934 | CPV-2b/Cat/Germany/CPV-447/94      |
| Z46651   | CPV-2b/Dog/Poland/46/94            |
| M74852   | CPV-2b/Dog/GA/CPV-133/90           |
| FJ005261 | CPV-2b/Dog/Germany/G162/97         |
| AF306450 | CPV-2b/Dog/Italy/637/96            |
| DQ025992 | CPV-2b/Dog/France/S23/04           |
| AF306444 | CPV-2b/Wolf/Italy/W42/95           |
| AF306449 | CPV-2b/Dog/Italy/616/95            |
| D26079   | CPV-2a/Dog/Japan/Y1/82             |
| DQ340409 | CPV-2b/Dog/Brazil/BR183/85         |
| M74849   | CPV-2b/Dog/TX/CPV-39/84            |
| U22896   | CPV-2b/Cat/ID/FPV-24/90            |
| DQ025952 | CPV-2a/Dog/France/B12/03           |
| DQ340404 | CPV-2a/Dog/Brazil/BR6/80           |
| DQ340406 | CPV-2a/Dog/Brazil/BR137/80         |
| DQ340405 | CPV-2a/Dog/Brazil/BR135/80         |
| EU659118 | CPV-2a/Dog/US/CPV-13/81            |
| DQ340410 | CPV-2a/Dog/Brazil/BR315/86         |
| M24003   | CPV-2a/Dog/IL/CPV-15/84            |
| M24000   | CPV-2a/Dog/VA/CPV-31/83            |
| DQ340408 | CPV-2a/Dog/Brazil/BR154/80         |
| DQ340407 | CPV-2a/Dog/Brazil/BR145/80         |
| FJ005263 | CPV-2b/Dog/Italy/42-49/05          |
| FJ005265 | CPV-2b/Dog/Italy/140/05            |
| JN867602 | CPV-2b/Dog/CA/148743/08            |
| DQ025991 | CPV-2b/Dog/France/S22/04           |
| DQ025961 | CPV-2b/Dog/France/C5/03            |
| JN867603 | CPV-2b/Dog/KS/81213/09             |
| JN867609 | CPV-2b/Dog/KY/93238/08             |
| AY742955 | CPV-2b/Dog/AZ/CPV-436/04           |
| JN867608 | CPV-2b/Dog/IL/24124/09             |
| JN867604 | CPV-2b/Dog/IL/137654/08            |

|                 |                                 |
|-----------------|---------------------------------|
| JN867605        | CPV-2b/Dog/US/142805/09         |
| AY742951        | CPV-2b/Dog/US/CPV-431/03        |
| EU659119        | CPV-2b/Dog/NJ/CPV-410/99        |
| EU659120        | CPV-2b/Dog/CA/CPV-411a/00       |
| EF592511        | CPV-2a/Dog/Taiwan/TWN1/06       |
| FJ265781        | CPV-2a/Dog/Taiwan/307/05        |
| AY869724        | CPV-2b/Dog/Taiwan/Taichung/03   |
| FJ265775        | CPV-2a/Dog/Taiwan/301/04        |
| FJ265778        | CPV-2a/Dog/Taiwan/304/05        |
| FJ265779        | CPV-2a/Dog/Taiwan/305/05        |
| FJ265776        | CPV-2a/Dog/Taiwan/302/05        |
| FJ265780        | CPV-2a/Dog/Taiwan/306/05        |
| FJ265777        | CPV-2a/Dog/Taiwan/303/05        |
| FJ265783        | CPV-2a/Dog/Taiwan/309/06        |
| FJ265782        | CPV-2a/Dog/Taiwan/308/06        |
| FJ265784        | CPV-2a/Dog/Taiwan/310/06        |
| FJ869135        | CPV-2b/Dog/Thailand/KU39/03     |
| JN867606        | CPV-2b/Dog/US/19923/09          |
| FJ005236        | CPV-2c/Dog/US/110-27/07         |
| JN867607        | CPV-2c/Dog/NY/LP62/08           |
| EF599097        | CPV-2b/Dog/South_Korea/DH326/05 |
| JN867619        | CPV-2b/Dog/NC/88023/09          |
| <b>JN867601</b> | <b>CPV/Raccoon/NJ/76836/10</b>  |
| FJ869125        | CPV-2b/Dog/Thailand/KU5/04      |
| DQ177497        | CPV-2b/Dog/China/HN-3/05        |
| U72696          | CPV-2b/Dog/Taiwan/T10/95        |
| AB115504        | CPV-2b/Dog/Japan/97-008/97      |
| AB054213        | CPV-2a/Cat/Taiwan/Taiwan_9/98   |
| U72697          | CPV-2a/Dog/Taiwan/T25/95        |
| U72695          | CPV-2a/Dog/Taiwan/T4/94         |
| AB054214        | CPV-2a/Leopard_cat/Taiwan/T1/95 |
| EU659121        | CPV-2b/Dog/CA/CPV-411b/00       |
| AY742936        | CPV-2b/Dog/CA/CPV-395/98        |
| FJ005260        | CPV-2b/Dog/Germany/G82/97       |
| FJ005262        | CPV-2b/Dog/Italy/311/04         |
| FJ005212        | CPV-2c/Dog/Italy/349/04         |
| FJ005231        | CPV-2c/Dog/Italy/406/06         |
| FJ005232        | CPV-2c/Dog/Italy/411/06         |
| FJ005248        | CPV-2c/Dog/Italy/219-2/08       |
| DQ025988        | CPV-2c/Dog/France/S19/04        |
| FJ005224        | CPV-2c/Dog/Italy/367/06         |
| FJ005199        | CPV-2c/Dog/Germany/G172/97      |
| FJ005223        | CPV-2c/Dog/Italy/365/06         |

|          |                            |
|----------|----------------------------|
| DQ025966 | CPV-2c/Dog/France/S2/03    |
| DQ025994 | CPV-2c/Dog/France/S25/04   |
| DQ025972 | CPV-2c/Dog/France/C12/04   |
| DQ025973 | CPV-2c/Dog/France/C13/04   |
| FJ005230 | CPV-2c/Dog/Italy/398/06    |
| FJ005220 | CPV-2c/Dog/Italy/337/06    |
| DQ025974 | CPV-2c/Dog/France/C14/04   |
| FJ005229 | CPV-2c/Dog/Italy/397/06    |
| DQ025955 | CPV-2c/Dog/France/B16/03   |
| FJ005238 | CPV-2c/Dog/Italy/158/07    |
| FJ005207 | CPV-2c/Dog/Italy/290/04    |
| DQ025976 | CPV-2c/Dog/France/S7/04    |
| FJ005213 | CPV-2c/Dog/Italy/9/05      |
| DQ025965 | CPV-2c/Dog/France/C9/03    |
| FJ005251 | CPV-2c/Dog/Italy/239/08    |
| DQ025977 | CPV-2c/Dog/France/S8/04    |
| DQ025956 | CPV-2c/Dog/France/B17/03   |
| DQ025987 | CPV-2c/Dog/France/S18/04   |
| DQ025953 | CPV-2c/Dog/France/B13/03   |
| DQ025990 | CPV-2c/Dog/France/S21/04   |
| DQ025960 | CPV-2c/Dog/France/C4/03    |
| DQ025951 | CPV-2c/Dog/France/B10/03   |
| FJ005209 | CPV-2c/Dog/Italy/303/04    |
| FJ005211 | CPV-2c/Dog/Italy/342/04    |
| FJ005237 | CPV-2c/Dog/Italy/159/07    |
| DQ025989 | CPV-2c/Dog/France/S20/04   |
| FJ005215 | CPV-2c/Dog/Italy/252/06    |
| FJ005204 | CPV-2c/Dog/Germany/G333/99 |
| FJ005198 | CPV-2c/Dog/Germany/G133/97 |
| FJ005200 | CPV-2c/Dog/Germany/G359/97 |
| DQ025969 | CPV-2c/Dog/France/S5/03    |
| FJ005208 | CPV-2c/Dog/Italy/291/04    |
| DQ025942 | CPV-2c/Dog/France/B1/01    |
| DQ025954 | CPV-2c/Dog/France/B14/03   |
| DQ025980 | CPV-2c/Dog/France/S11/04   |
| DQ025978 | CPV-2c/Dog/France/S9/04    |
| DQ025970 | CPV-2c/Dog/France/C10/04   |
| FJ005216 | CPV-2c/Dog/Italy/284/06    |
| FJ005201 | CPV-2c/Dog/Germany/G362/97 |
| FJ005202 | CPV-2c/Dog/Germany/G367/97 |
| FJ005196 | CPV-2c/Dog/Germany/G7/97   |
| FJ005246 | CPV-2c/Dog/Spain/128/08    |
| FJ005245 | CPV-2c/Dog/Italy/127-B/08  |

|          |                               |
|----------|-------------------------------|
| FJ005247 | CPV-2c/Dog/Belgium/195/08     |
| DQ025968 | CPV-2c/Dog/France/S4/03       |
| FJ005210 | CPV-2c/Dog/Italy/307/04       |
| FJ005227 | CPV-2c/Dog/Italy/389/06       |
| FJ005222 | CPV-2c/Dog/Italy/359/06       |
| FJ005214 | CPV-2c/Dog/Spain/67/06        |
| DQ025981 | CPV-2c/Dog/France/S12/04      |
| DQ025975 | CPV-2c/Dog/France/S6/04       |
| FJ005225 | CPV-2c/Dog/Italy/382/06       |
| FJ005203 | CPV-2c/Dog/Germany/G52-9-2/98 |
| FJ005195 | CPV-2c/Dog/Italy/136/00       |
| FJ005197 | CPV-2c/Dog/Germany/G51/97     |
| DQ025979 | CPV-2c/Dog/France/S10/04      |
| FJ005219 | CPV-2c/Dog/Italy/336/06       |
| AF401519 | CPV-2c/Dog/Italy/695/99       |
| FJ005206 | CPV-2c/Dog/Italy/287/04       |
| FJ005243 | CPV-2c/Dog/Italy/243/07       |
| FJ005240 | CPV-2c/Dog/Italy/208/07       |
| FJ005233 | CPV-2c/Dog/Italy/40/07        |
| FJ005221 | CPV-2c/Dog/Italy/340/06       |
| FJ005218 | CPV-2c/Dog/Italy/330/06       |
| FJ005235 | CPV-2c/Dog/US/67-11/07        |
| FJ005226 | CPV-2c/Dog/Italy/383/06       |
| DQ025985 | CPV-2c/Dog/France/S16/04      |
| FJ005205 | CPV-2c/Dog/Italy/279/04       |
| FJ005217 | CPV-2c/Dog/Italy/327/06       |
| FJ005234 | CPV-2c/Dog/Italy/43/07        |
| FJ005249 | CPV-2c/Dog/Italy/219-5/08     |
| FJ005239 | CPV-2c/Dog/Italy/165-A/07     |
| FJ005228 | CPV-2c/Dog/Italy/393/06       |
| FJ005242 | CPV-2c/Dog/Italy/217/07       |
| FJ005244 | CPV-2c/Dog/Italy/127-A/08     |
| FJ005241 | CPV-2c/Dog/Italy/215-2/07     |
| FJ005250 | CPV-2c/Dog/Italy/219-13/08    |

---

**Table 2. NS1 Gene sequences.**

|          |                                |
|----------|--------------------------------|
| EU659111 | FPV/Cat/US/FPV-3/67            |
| EU659115 | FPV/Cat/US/Kai/06              |
| AB000048 | FPV/Cat/Japan/483/90           |
| AB000049 | FPV/Cat/Japan/94-1/94          |
| AB000058 | FPV/Cat/Japan/Som1/94          |
| EU659114 | FPV/Mountain_lion/CO/FPV-8b/89 |
| EU659113 | FPV/Mountain_lion/CO/FPV-8a/89 |

|          |                                   |
|----------|-----------------------------------|
| AB000069 | FPV/Cat/Japan/TU8/76-77           |
| X55115   | FPV/Cat/Australia/193/70          |
| AB000053 | FPV/Cat/Japan/Fukagawa/93         |
| AB000063 | FPV/Cat/Japan/TU12/79             |
| AB000051 | FPV/Cat/Japan/AO1/94              |
| AB000067 | FPV/Cat/Japan/TU4/75              |
| AB000065 | FPV/Cat/Japan/TU2/75              |
| AB000055 | FPV/Cat/Japan/Obihiro/74          |
| AB000057 | FPV/Cat/France/PLI-IV/68          |
| D00765   | MEV/Mink/Japan/Abashiri/78        |
| AB000060 | FPV/Cat/Japan/Som4/95             |
| AY742934 | CPV-2b/Cat/Germany/CPV-447/94     |
| EU659117 | CPV-2/Dog/NY/CPV-6/79             |
| EU659118 | CPV-2a/Dog/US/CPV-13/81           |
| AY787926 | CPV-2a/Dog/IL/CPV-15/84           |
| EU659116 | CPV-2/Dog/FL/CPV-5/80             |
| JN867613 | CPV/Raccoon/FL/381/09             |
| JN867612 | CPV/Raccoon/TN/351/09             |
| JN867610 | CPV/Raccoon/VA/118-A/07           |
| JN867611 | CPV/Raccoon/KY/358-B/09           |
| EF011664 | CPV-2a/Dog/China/B2004/04         |
| EU310373 | CPV-2a/Dog/China/nj01/06          |
| AY742954 | CPV-2a/Dog/CA/CPV-435/03          |
| EU659121 | CPV-2b/Dog/CA/CPV-411b/00         |
| AY742936 | CPV-2b/Dog/CA/CPV-395/98          |
| AY742952 | CPV-2b/Dog/US/CPV-431/03          |
| EU659120 | CPV-2b/Dog/CA/CPV-411a/00         |
| EU659119 | CPV-2b/Dog/NJ/CPV-410/99          |
| AY742932 | CPV-2b/Dog/TX/CPV-193/91          |
| AY787927 | CPV-2b/Dog/GA/CPV-133/90          |
| JN867614 | CPV/Raccoon/VA/278-A/09           |
| D26079   | CPV-2a/Dog/Japan/Y1/82            |
| AY742933 | CPV-2a/Dog/New_Zealand/CPV-339/94 |
| AY787930 | CPV-2b/Dog/TX/CPV-39/84           |
| JN867618 | CPV/Raccoon/WI/37/10              |
| JN867617 | CPV/Raccoon/GA/349/08             |
| JN867615 | CPV/Raccoon/GA/287/08             |
| JN867616 | CPV/Raccoon/GA/289/08             |
| AY742935 | CPV-2a/Dog/Germany/CPV-U6/96      |
| AY787929 | CPV-2a/Dog/VA/CPV-31/83           |
| AY742956 | CPV-2b/Dog/AZ/CPV-436/04          |

---
